1 **1. Title Page**

2 **Morphometric Analysis of Spina Bifida after Fetal Repair Shows New Subtypes with**  
3 **Associated Outcomes**

4 Lovepreet K. Mann, MBBS<sup>1</sup>, Shreya Pandiri, BS<sup>1</sup>, Neha Agarwal, MD<sup>1</sup>, Hope Northrup, MD<sup>2</sup>, Kit  
5 Sing Au, PhD<sup>2</sup>, Elin Grundberg, PhD<sup>3</sup>, Eric P. Bergh, MD<sup>1</sup>, Mary T. Austin, MD, MPH<sup>4</sup>, Rajan  
6 Patel, MD<sup>5</sup>, Brandon Miller, MD, PhD<sup>4</sup>, Sen Zhu, PhD<sup>1</sup>, Jonathan S. Feinberg, PhD<sup>1</sup>, Dejian Lai,  
7 PhD<sup>6</sup>, KuoJen Tsao, MD<sup>4</sup>, Stephen A. Fletcher, DO<sup>4</sup>, Ramesha Papanna, MD, MPH<sup>1</sup>

8 <sup>1</sup> Division of Fetal Intervention, Department of Obstetrics, Gynecology & Reproductive Sciences,  
9 McGovern Medical School, UTHealth Science Center, Houston, TX 77030

10 <sup>2</sup> Department of Pediatrics, McGovern Medical School, UTHealth Science Center, Houston, TX  
11 77030

12 <sup>3</sup> Genomic Medicine Center, Department of Pediatrics, Children's Mercy Kansas City, Kansas  
13 City, MO 64108

14 <sup>4</sup> Department of Pediatric Surgery, McGovern Medical School, UTHealth Science Center,  
15 Houston, TX 77030

16 <sup>5</sup> Neuroradiology Section, Department of Radiology, Texas Children's Hospital, Houston, TX  
17 77030

18 <sup>6</sup> Department of Biostatistics, School of Public Health, UTHealth Houston, Houston, TX

19

20 **Corresponding author:**

21 Lovepreet K. Mann, MBBS

22 6431 Fannin Street, Suite 3.274

23 Houston, TX 77030

24 Phone: 713-500-6423

25 FAX: 713-500-0799

26 Email: [lovepreet.mann@uth.tmc.edu](mailto:lovepreet.mann@uth.tmc.edu)

27 and

28 Ramesha Papanna MD MPH

29 6431 Fannin Street, Suite 3.274

30 Houston, TX 77030

31 Phone: 713-500-5859

32 FAX: 713-500-0799

33 Email: [ramesha.papanna@uth.tmc.edu](mailto:ramesha.papanna@uth.tmc.edu)

34 **Manuscript word count: 2969**

35 **2. Key Points**

36 **Question:** Are variations in spina bifida lesion morphology associated with clinical presentation  
37 and outcomes?

38 **Findings:** This secondary analysis of intraoperative images and video from fetoscopic spina  
39 bifida repair surgery distinguished five types of spina bifida lesion based on extent of nerve root  
40 stretching and neural placode exposure. Preoperative fetal characteristics and postoperative  
41 outcomes were significantly associated with lesion type.

42 **Meaning:** The novel classification of spina bifida to reveal a spectrum with clinical and research  
43 implications.

44

45 **3. Abstract**

46 **Importance:** The binary classification of spina bifida lesions as myelomeningocele (with sac) or  
47 myeloschisis (without sac) belies a spectrum of morphologies, which have not been correlated  
48 to clinical characteristics and outcomes.

49 **Objective:** To characterize spina bifida lesion types and correlate them with preoperative  
50 presentation and postoperative outcomes.

51 **Design:** Secondary analysis of images and videos obtained during fetoscopic spina bifida repair  
52 surgery from 2020-2023.

53 **Setting:** Fetal surgery was performed at a quaternary care center.

54 **Participants:** A prospective cohort of patients referred for fetal spina bifida underwent  
55 fetoscopic repair under an FDA-approved protocol. Of 60 lesions repaired, 57 had available  
56 images and were included in the analysis.

57 **Intervention(s) or Exposure(s):** We evaluated lesion morphology on high-resolution  
58 intraoperative images and videos to categorize lesions based on placode exposure and nerve  
59 root stretching.

60 **Main Outcome(s) and Measure(s):** The reproducibility of the lesion classification was  
61 assessed via Kappa interrater agreement. Preoperative characteristics analyzed include  
62 ventricle size, tonsillar herniation level, lower extremities movement, and lesion dimensions.  
63 Outcomes included surgical time, need for patch for skin closure, gestational age at delivery,  
64 preterm premature rupture of membranes (PPROM), and neonatal cerebrospinal fluid (CSF)  
65 diversion.

66 **Results:** We distinguished five lesion types that differ across a range of sac sizes, nerve root  
67 stretching, and placode exposure, with 93% agreement between examiners ( $p < 0.001$ ). Fetal

68 characteristics at preoperative evaluation differed significantly by lesion type, including lesion  
69 volume ( $p < 0.001$ ), largest ventricle size ( $p = 0.008$ ), tonsillar herniation ( $p = 0.005$ ), and head  
70 circumference ( $p = 0.03$ ). Lesion level, talipes, and lower extremities movement did not differ by  
71 type. Surgical and perinatal outcomes differed by lesion type, including need for patch skin  
72 closure ( $p < 0.001$ ), gestational age at delivery ( $p = 0.01$ ), and NICU length of stay ( $p < 0.001$ ).  
73 PPRM, CSF leakage at birth, and CSF diversion in the NICU did not differ between lesion  
74 groups. Linear regression associated severity of ventriculomegaly with lesion type, but not with  
75 tonsillar herniation level.

76 **Conclusions and Relevance:** There is a distinct phenotypic spectrum in open spina bifida with  
77 differential baseline presentation and outcomes. Severity of ventriculomegaly is associated with  
78 lesion type, rather than tonsillar herniation level. Our findings expand the classification of spina  
79 bifida to reveal a spectrum that warrants further study.

80

#### 81 **4. Introduction**

82 Spina bifida, the most common open neural tube defect in humans compatible with life,  
83 develops when a fetus's neural tube fails to close within the first four weeks after conception.<sup>1,2</sup>  
84 The resulting lesion is conventionally typed as myelomeningocele or myeloschisis, based on the  
85 presence or absence, respectively, of a cerebrospinal fluid (CSF)-filled sac over the open  
86 neural tube.<sup>3</sup> In myelomeningocele, this sac protects the covered portion of the spinal cord from  
87 exposure to amniotic fluid but stretches the nerve roots. Both lesion types are characterized by  
88 CSF leakage, and the developing central nervous system's exposure to amniotic fluid results in  
89 hydrocephalus, hindbrain herniation (Chiari type II malformation), and consequent long-term  
90 morbidity and mortality.<sup>4</sup> These two lesion types represent a spectrum of morphologies,  
91 however, as neural placode exposure to amniotic fluid in utero and nerve root stretching at the  
92 lesion site vary by degree.<sup>3</sup> Clinical features also vary, including severity of ventriculomegaly  
93 and loss of lower extremities function.

94 Spina bifida's formation and effects have been explained by a two-hit hypothesis,  
95 wherein the initial defect that prevents neural tube closure is followed by chemical or  
96 mechanical damage to the exposed neural placode in utero.<sup>5</sup> Reducing the placode's exposure  
97 to amniotic fluid to minimize intrauterine damage and reverse hindbrain herniation provided the  
98 rationale for repairing spina bifida prenatally.<sup>6</sup> The randomized Management of  
99 Myelomeningocele Study (MOMS) showed that patients who underwent prenatal surgery to  
100 repair spina bifida needed ventriculoperitoneal shunting less often and had better spinal cord  
101 function than those who underwent postnatal repair.<sup>7</sup> Since MOMS, prenatal spina bifida repair  
102 via open hysterotomy has become a widely accepted treatment option, and less invasive,  
103 fetoscopic repair techniques have been tested with promising results.<sup>8,9</sup> Nonetheless, children  
104 who undergo in-utero spina bifida repair do not all benefit: in the MOMS cohort, 58% could not  
105 ambulate independently at 30 months, and 68% needed shunt placement.<sup>7</sup>

106           Understanding the factors that contribute to this variability in long-term benefits after in-  
107    utero spina bifida repair is essential to improving clinical outcomes. Although recent  
108    retrospective studies have shown that fetal and neonatal motor function vary according to spina  
109    bifida lesion type,<sup>3,10,11</sup> a detailed typology of spina bifida lesions, characteristics and associated  
110    outcomes is currently lacking.

111           In-utero repair provides an opportunity to directly visualize and assess spina bifida lesion  
112    morphology midway through gestation. This study leveraged this opportunity to identify and  
113    characterize a spectrum of spina bifida lesion types and correlate them with preoperative  
114    presentation and postoperative outcomes.

115

116

## 117 **5. Methods**

### 118 **Study Design**

119 We conducted a secondary analysis of intraoperative images and video from fetoscopic spina  
120 bifida repair surgery to identify lesion types based on morphology and correlate these types with  
121 preoperative characteristics and postoperative outcomes.

### 122 **Study Population**

123 A prospective cohort of patients underwent fetoscopic spina bifida repair under approved  
124 protocols between 2020 and 2023. Patients referred to the UTHealth Houston Fetal Center for  
125 suspected fetal spina bifida underwent a comprehensive ultrasound evaluation, fetal magnetic  
126 resonance imaging (fMRI), and multidisciplinary counseling. Fetoscopic in-utero spina bifida  
127 repair was offered to those who met MOMS trial inclusion criteria,<sup>7</sup> with maternal body mass  
128 index (BMI) limit extended from 35 kg/m<sup>2</sup> to 45 kg/m<sup>2</sup> and amniotic fluid alpha fetoprotein higher  
129 than 2.5 multiples of the median and positive for acetylcholinesterase to confirm CSF leakage  
130 into the amniotic fluid. Eligible patients were offered participation in an institutional review board  
131 (IRB)-approved spina bifida registry and an FDA- and IRB-approved trial studying the feasibility  
132 of laparotomy-assisted fetoscopic spina bifida repair using a cryopreserved human umbilical  
133 cord allograft as a meningeal patch (NCT06042140). Patients were counseled about risks,  
134 benefits and alternatives, and informed consent was obtained before surgery. High-resolution  
135 images and videos were collected during surgery per protocol. Patients with no images  
136 available were excluded from this analysis.

### 137 **Preoperative evaluation**

138 Patients underwent ultrasound examinations by certified sonographers utilizing GE E8 and E10  
139 (GE Voluson Expert Ultrasound Equipment; GE Healthcare Ultrasound, Milwaukee, WI)



140 systems. Lesions were measured in three dimensions: anterior-posterior (posterior vertebral  
141 body surface to the sac surface), transverse (widest dimension of the sac) and vertical (cephalo-  
142 caudad). In lesions with no sac, the vertical and transverse dimensions were measured from the  
143 skin defect. The anterior-posterior dimension was measured as zero if there was no  
144 displacement of the sac. Fetal lower extremity movements were evaluated, with normal  
145 movements defined as any movement at the hips, knees, or ankles over 30 minutes. Right and  
146 left lateral ventricles were measured in the posterior horn at the choroid plexus. Tonsillar  
147 herniation was evaluated by fMRI per established methods.<sup>12,13</sup>

### 148 **Fetoscopic spina bifida repair**

149 In-utero spina bifida repair was performed via laparotomy-assisted fetoscopic approach, using  
150 cryopreserved human umbilical cord allografts (HUC-NEOX Cord 1K<sup>®</sup>, Tissue Tech Inc, Miami,  
151 FL) as a meningeal patch over the spinal placode, followed by skin closure (eMethods).<sup>14</sup> If the  
152 skin defect was too large to approximate the edges together, then a second HUC patch was  
153 used for skin closure. Video and images were captured via high-resolution Hopkins<sup>®</sup> 45°  
154 Telescope 5 mm (Karl Storz Endoscopy America, Inc.) used for visualization.

155 After surgery, patients recovered in hospital for 2-3 days. Patients stayed in Houston for  
156 management at The Fetal Center or returned home for delivery. Neonatal care was managed  
157 according to standard care.

### 158 **Outcomes**

159 Duration of surgery and need for patch skin closure were recorded. Perinatal outcomes included  
160 gestational age at delivery, preterm premature rupture of membranes (PPROM), and CSF  
161 diversion in the neonatal intensive care unit (NICU) (at the pediatric neurosurgeon's discretion).  
162 For patients who delivered outside The Fetal Center, perinatal outcomes were collected by  
163 delivery record review and calls to patients.

164 **Lesion classification**

165 By reviewing intraoperative images and videos, we distinguished five lesion types based on  
166 nerve root stretching and placode exposure (Figure 1).

- 167 • **Type 1:** Large sac, neural placode displaced from the spinal canal and attached to the  
168 highest portion of the protruded thecal sac. Central canal is open through a small  
169 opening with skin and meningeal coverage of the sac. Minimal neural placode exposure  
170 to amniotic fluid. Nerve roots are stretched from the spinal canal.
- 171 • **Type 2:** Large sac, the placode displaced from the spinal canal to the highest portion of  
172 the protruded thecal sac. The placode is open for more than half the lesion's vertical  
173 length, with direct exposure to amniotic fluid. Nerve roots are stretched from the spinal  
174 canal.
- 175 • **Type 3:** Like Type 2, but less placode displacement and less nerve root stretching. The  
176 placode is open less than half the lesion's vertical length, with less exposure to amniotic  
177 fluid.
- 178 • **Type 4:** The placode is not displaced from the vertebral canal, and nerve root stretching  
179 is minimal. The placode is open, but some meningeal coverage reduces exposure to  
180 amniotic fluid.
- 181 • **Type 5:** Like Type 4, but no meningeal coverage. The placode is completely exposed to  
182 amniotic fluid. Nerve roots are not stretched from the spinal canal.

183 The primary reviewer (RP) classified each lesion retrospectively based on these criteria. Then, a  
184 second reviewer (LKM) independently classified each lesion by the same criteria for  
185 reproducibility. Both were blinded to preoperative and postoperative findings and outcomes.  
186 Disagreement cases are presented in the Results.

187

188 **Statistical Analysis**

189 Data were analyzed and visualized in R using ggpubr and ggplot2 packages. Descriptive, then  
190 inferential statistics were reported. We derived the semi-ellipsoid lesion volume by the equation,  
191  $V = \pi * \frac{4}{3} * A * B * C$ , where A, B, and C are lesion dimensions. Due to non-normally distributed  
192 data, the Kruskal-Wallis test was performed. Mann–Whitney U test for multiple comparisons  
193 was used for post hoc analysis to determine significant main effects. Categorical data were  
194 compared via Fisher’s Exact test. Interrater agreement for lesion types was assessed using  
195 kappa statistics. Preoperative ventricle size and its association with lesion type, tonsillar  
196 herniation and lesion level were evaluated via linear regression in SAS (9.4, Cary, NC).

197

198

199 **6. Results**

200 Of 60 spina bifida lesions repaired fetoscopically at The Fetal Center from 2020–2023, 57 had  
201 high-quality images available. Forty-eight patients were enrolled through an FDA feasibility  
202 study; nine were enrolled as practice of medicine cases in an observational cohort study.  
203 Nineteen patients delivered outside The Fetal Center.

204 **Lesion classification**

205 Lesion types 1 through 5 accounted for 14%, 39%, 16%, 14%, and 18%, respectively, of the  
206 lesions in our cohort (Table 1). Reviewers classified lesions with 93% agreement ( $p < 0.001$ ).  
207 They disagreed in three cases: Type 4 and Type 5; Type 2 and Type 3; Type 2 and Type 5. The  
208 third disagreement case was reviewed: the second reviewer's interpretation was affected by the  
209 angle of the lesion image. The primary reviewer's classification was selected for the final  
210 analysis in all cases.

211 **Preoperative characteristics**

212 Maternal demographics did not differ between lesion groups, nor did fetal extremity movement,  
213 lesion level, or talipes (Table 1). Estimated fetal weight (EFW) did not differ by lesion type when  
214 considered as an aggregate measure, but analysis of EFW's subcomponents found significant  
215 differences in head circumference (HC) by lesion type ( $p = 0.03$ ): fetuses with Type 2 lesions had  
216 a higher percentile HC than those with Types 4 ( $p < 0.05$ ) and 5 ( $p < 0.001$ ), and those with Types  
217 1 and 3 had a higher percentile HC than those with Type 5 ( $p < 0.01$ ) (Figure 2).

218 Lesion dimensions differed by type (Table 1; eFigure 1). Type 1 lesions were  
219 significantly larger than all other types in all three dimensions and in volume. Type 2 lesions  
220 were longer than Type 3 vertically and larger than Types 3-5 in the anterior-posterior and  
221 transverse dimensions and in volume. Type 3 was wider than Type 4 and larger than Type 5 in  
222 the anterior-posterior and transverse dimensions and in volume.

223 Largest ventricle size differed by lesion type ( $p=0.0074$ ), as fetuses with Type 2 lesions  
224 had larger ventricles than those with Types 1, 4, and 5 (Table 1, Figure 2). Right ( $p=0.017$ ) and  
225 left ( $p=0.0058$ ) ventricle sizes differed similarly by lesion type: Type 2 had larger right ventricles  
226 than Types 1 and 4 and larger left ventricles than Types 1, 4, and 5 (Table 1; eFigure 2A, 2C).  
227 When adjusting for HC, Type 2 had larger right and left ventricles than Types 1 and 4; Type 5  
228 had larger right ventricles than Type 4 and larger left ventricles than Types 1 and 4 (eFigure 2B,  
229 2D).

### 230 **Ventricle size is associated with lesion type**

231 We evaluated the association between ventricle size and lesion type, lesion level, and tonsillar  
232 herniation via linear regression. Conditioning on the lesion level and tonsillar herniation  
233 (foramen magnum or above: mild; C1-C2: moderate; C3-C4: severe), largest ventricle size is  
234 significantly associated with lesion type (Table 2). Specifically, largest ventricle is greater in  
235 Type 2 than in Type 5 lesions ( $p=0.008$ ). Fetuses with lower lesion levels had smaller ventricles,  
236 but this was not statistically significant ( $p=0.07$ ).

### 237 **Surgical and neonatal outcomes**

238 All 10 (100.0%) Type 5 lesions required skin patch closure, which differed from all other lesion  
239 types ( $p<0.001$ ). Surgical time and gestational age at surgery did not differ between groups, nor  
240 did PPROM, CSF leakage at birth, wound revision, or CSF diversion in the NICU (Table 3).

241 Neonates with Type 1 lesions were delivered at an earlier gestational age than those  
242 with Types 2, 3, and 5; those with Type 4 lesions were delivered earlier than those with Type 2  
243 (Table 3, eFigure 3A). Neonates with Type 2 and 3 lesions required fewer days in the NICU  
244 than those with Types 1 and 4; Type 2 also had fewer NICU days than Type 5 ( $p<0.001$ )  
245 (eFigure 3B).

246

247 **Cortical Index from baseline to delivery**

248 Despite significant differences in HC percentile at baseline among lesion groups ( $p=0.0015$ ), HC  
249 percentile at delivery did not differ by lesion type ( $p=0.12$ ) (Figure 2). By contrast, largest  
250 ventricle size at last ultrasound (within four weeks of delivery;  $n=49$ ) differed by lesion type  
251 ( $p=0.028$ ): Type 2 had larger ventricles than Types 1 and 5. Analysis of the change in HC  
252 percentile from baseline to delivery found a marked increase among those with Type 5 lesions  
253 ( $p=0.002$ ). Types 2–4 increased in HC, but not statistically significantly. Ventricle size increased  
254 in Types 2 ( $p=0.00011$ ), 3 ( $p=0.0039$ ), and 5 ( $p=0.0059$ ).

255 To determine the extent to which the increase in HC from baseline to delivery reflects  
256 cortical development versus ventricle growth, we calculated the Cortical Index (CI) by dividing  
257 HC (in mm) by ventricle diameter (in mm).<sup>15</sup> CI at baseline differed significantly by lesion type  
258 ( $p=0.0077$ ): Type 2 had a lower CI than Types 1 and 4, consistent with ventricular differences.  
259 CI before delivery did not differ by lesion type ( $p=0.073$ ). CI increased from baseline in Type 5  
260 ( $p=0.02$ ), but not in other lesion groups (Figure 2).

261

## 262 **7. Discussion**

263 Spina bifida is conventionally classified as myelomeningocele or myeloschisis, based on the  
264 presence or absence, respectively, of a sac covering the open neural tube.<sup>10</sup> However, our  
265 clinical observations from performing spina bifida repair at a high-volume center suggested a  
266 range of lesion morphologies inconsistent with a binary classification. Clinical features, fetal  
267 anatomy, and postnatal outcomes also vary considerably. Understanding the factors that  
268 contribute to this variability requires a more complex classification of spina bifida lesion types  
269 and their association with preoperative presentation and postoperative outcomes. As a step  
270 toward that classification, we evaluated intraoperative images and videos, and we distinguished  
271 five types of spina bifida lesions based on nerve root stretching and neural placode exposure.  
272 Fetal characteristics at baseline evaluation, including head circumference and ventricle size,  
273 differed significantly by these lesion types. Operative and perinatal outcomes, including need for  
274 patch skin closure, gestational age at delivery, and length of NICU stay, also differed by lesion  
275 type. Collectively, these findings suggest a spectrum of spina bifida types that warrants further  
276 characterization. These findings are potentially significant for clinical practice, as understanding  
277 the range of spina bifida presentations and their associated outcomes would inform patient  
278 counseling and surgical planning.

279 In the study, lesion type was the most important association factor for ventriculomegaly,  
280 with Type 2 having the largest ventricular diameter. However, there was no association between  
281 ventricle size and tonsillar herniation level. This differs from the common understanding that  
282 hindbrain herniation obstructing cerebrospinal fluid flow through the foramen Luschka and  
283 Magendie in the fourth ventricle contributes to ventriculomegaly.<sup>19</sup> Future studies in a larger  
284 cohort would allow group analyses of the relation between ventricle size, lesion level, and  
285 hindbrain herniation within each lesion type.

286 Our analysis of fetal characteristics and perinatal outcomes by lesion type revealed  
287 significant gains in head circumference (HC), from around the 5<sup>th</sup> to the 75<sup>th</sup> percentile, among  
288 those with Type 5 lesions. That group's corresponding increase in Cortical Index (CI), reflecting  
289 faster growth of HC than of ventricles, suggests that the changes in HC are not attributable to  
290 ventriculomegaly alone and may indicate cortical mass development after in-utero spina bifida  
291 repair. Similarly, Danzer et al. reported fetal head biometry changes with increases in CI after  
292 in-utero repair in 50 fetuses.<sup>15</sup> In our cohort, fetuses with lesion Types 2-4 also showed  
293 increases in HC from baseline to delivery, but these were not statistically significant, nor did CI  
294 change significantly in those groups. One possible explanation is that fetuses with Type 2-4  
295 lesions may have narrowing of the cerebral aqueduct that does not improve with in-utero spina  
296 bifida repair. Other recent analyses have reported differences in motor function between  
297 different lesion types. Oliver et al.'s review of 404 patients found that myelomeningocele lesions,  
298 whether repaired prenatally or postnatally, are associated with fetal talipes and impaired lower  
299 extremities movement.<sup>3</sup> Corroenne et al. reported that fetuses with myeloschisis were 3.1 times  
300 more likely to have intact motor function prenatally<sup>10</sup> and 11.2 times more likely to have intact  
301 motor function at birth.<sup>11</sup> Farmer et al.'s study of pediatric outcomes in the MOMS cohort  
302 reported that absence of a sac covering the lesion was associated with independent ambulation  
303 at 30 months among patients who underwent prenatal surgery.<sup>18</sup> The extent to which  
304 differences in presentation and outcomes across lesion types reflect anatomical variations  
305 versus response to therapy or other factors requires further investigation. The lack of significant  
306 findings in several of the lesion types could be due to the smaller sample sizes in those types.  
307 Larger studies are needed to further explain these findings.

308 Our demonstration of a broader spectrum of lesion types than previously assumed may  
309 have implications for future molecular studies, allowing insight into genetic and epigenetic  
310 mechanisms contributing to lesion development. Spina bifida is believed to be highly heritable,



311 but its complex etiology, rarity in the population and phenotypic heterogeneity make variant  
312 detection and gene/pathway discovery challenging. Studies have identified deleterious genomic  
313 variants that may increase the risk for developing spina bifida.<sup>20,21</sup> Others have demonstrated  
314 the importance of studying the genomic and transcriptomic profiles of spina bifida lesions.<sup>22-24</sup>  
315 Nonetheless, further studies are needed to explore the molecular basis for variations in spina  
316 bifida lesion formation and its clinical implications.

317 Our study's major strength is its prospective, consistent data collection under an FDA  
318 clinical trial protocol. All surgeries were performed at a single, high-volume center, thus ensuring  
319 procedural consistency. Our study population was recruited under broad inclusion criteria  
320 comparable to the MOMS trial. We confirmed the interrater reliability of our classification  
321 between two independent reviewers. This study was limited by a small sample size not powered  
322 to compare differences between groups that were not significant, such as lower extremities  
323 movement. The lesion types of those not offered prenatal surgery may differ from those who  
324 underwent surgery. Differences in neonatal management across centers may have affected  
325 outcomes for patients who delivered outside The Fetal Center. There was no identifiable reason  
326 for preterm birth in the Type 1 group. This needs further evaluation in a larger cohort.

## 327 **Conclusions**

328 Direct visualization of spina bifida lesions during fetoscopic repair surgery distinguished five  
329 types of spina bifida that differ with respect to nerve root stretching and neural placode  
330 exposure to amniotic fluid. These types may have implications for baseline function and  
331 prognosis. Further research is needed to explore the molecular basis for variations in spina  
332 bifida formation and response to in-utero therapy.

333 **8. Acknowledgements**

334 Lovepreet K. Mann and Ramesha Papanna had full access to all the data in the study and take  
335 responsibility for the integrity of the data and the accuracy of the data analysis. The authors  
336 would like to acknowledge Arthur Day, MD, Bradley E. Weprin, MD and John Honeycutt, MD for  
337 their assessments, as independent pediatric neurosurgeons, of the completeness of the surgical  
338 closure for the FDA IDE study.

339 **Disclosure:** The authors declare no competing financial interest.

340 **Funding source:** Lovepreet K. Mann's, Stephen A. Fletcher's and Ramesha Papanna's efforts  
341 for this project were partially funded by NICHD (1R01HD105173).

342

343

344 **9. References**

- 345 1. Smith JL, Schoenwolf GC. Neurulation: coming to closure. *Trends Neurosci.* Nov  
346 1997;20(11):510-7. doi:10.1016/s0166-2236(97)01121-1
- 347 2. Manning SM, Jennings R, Madsen JR. Pathophysiology, prevention, and potential  
348 treatment of neural tube defects. *Ment Retard Dev Disabil Res Rev.* 2000;6(1):6-14.  
349 doi:10.1002/(SICI)1098-2779(2000)6:1<6::AID-MRDD2>3.0.CO;2-B
- 350 3. Oliver ER, Heuer GG, Thom EA, et al. Myelomeningocele sac associated with worse  
351 lower-extremity neurological sequelae: evidence for prenatal neural stretch injury? *Ultrasound*  
352 *Obstet Gynecol.* Jun 2020;55(6):740-746. doi:10.1002/uog.21891
- 353 4. Jeelani Y, McComb JG. Congenital hydrocephalus associated with myeloschisis. *Childs*  
354 *Nerv Syst.* Oct 2011;27(10):1585-8. doi:10.1007/s00381-011-1560-4
- 355 5. Juriloff DM, Harris MJ. Insights into the Etiology of Mammalian Neural Tube Closure  
356 Defects from Developmental, Genetic and Evolutionary Studies. *J Dev Biol.* Aug 21  
357 2018;6(3)doi:10.3390/jdb6030022
- 358 6. Meuli M, Meuli-Simmen C, Hutchins GM, et al. In utero surgery rescues neurological  
359 function at birth in sheep with spina bifida. *Nat Med.* Apr 1995;1(4):342-7.
- 360 7. Adzick NS, Thom EA, Spong CY, et al. A randomized trial of prenatal versus postnatal  
361 repair of myelomeningocele. *N Engl J Med.* Mar 17 2011;364(11):993-1004.  
362 doi:10.1056/NEJMoa1014379
- 363 8. Moldenhauer JS, Adzick NS. Fetal surgery for myelomeningocele: After the  
364 Management of Myelomeningocele Study (MOMS). *Semin Fetal Neonatal Med.* Dec  
365 2017;22(6):360-366. doi:10.1016/j.siny.2017.08.004
- 366 9. Kabagambe SK, Jensen GW, Chen YJ, Vanover MA, Farmer DL. Fetal Surgery for  
367 Myelomeningocele: A Systematic Review and Meta-Analysis of Outcomes in Fetoscopic versus  
368 Open Repair. *Fetal Diagn Ther.* Sep 15 2017;doi:10.1159/000479505
- 369 10. Corroenne R, Sanz Cortes M, Johnson RM, et al. Impact of the cystic neural tube  
370 defects on fetal motor function in prenatal myelomeningocele repairs: A retrospective cohort  
371 study. *Prenat Diagn.* Jul 2021;41(8):965-971. doi:10.1002/pd.5992
- 372 11. Corroenne R, Yopez M, Pyarali M, et al. Prenatal predictors of motor function in children  
373 with open spina bifida: a retrospective cohort study. *BJOG: An International Journal of*  
374 *Obstetrics & Gynaecology.* 2021;128(2):384-391. doi:https://doi.org/10.1111/1471-0528.16538
- 375 12. Brock CO, Bergh EP, Fishel Bartal M, et al. The significance of hindbrain herniation  
376 reversal following prenatal repair of neural tube defects. *J Neurosurg Pediatr.* Jul 1  
377 2023;32(1):106-114. doi:10.3171/2023.2.Peds22457
- 378 13. Nagaraj UD, Bierbrauer KS, Zhang B, Peiro JL, Kline-Fath BM. Hindbrain Herniation in  
379 Chiari II Malformation on Fetal and Postnatal MRI. *AJNR Am J Neuroradiol.* May  
380 2017;38(5):1031-1036. doi:10.3174/ajnr.A5116
- 381 14. Backley S, Bergh E, Garnett J, et al. Fetal cardiovascular changes during open and  
382 fetoscopic in-utero spina bifida closure. *Ultrasound in Obstetrics & Gynecology.*  
383 n/a(n/a)doi:https://doi.org/10.1002/uog.27579
- 384 15. Danzer E, Johnson MP, Wilson RD, et al. Fetal head biometry following in-utero repair of  
385 myelomeningocele. *Ultrasound Obstet Gynecol.* Nov 2004;24(6):606-11. doi:10.1002/uog.1780
- 386 16. Tortori-Donati P, Rossi A, Cama A. Spinal dysraphism: a review of neuroradiological  
387 features with embryological correlations and proposal for a new classification. *Neuroradiology.*  
388 Jul 2000;42(7):471-91. doi:10.1007/s002340000325
- 389 17. Papanna R, Fletcher S, Moise KJ, Jr., Mann LK, Tseng SC. Cryopreserved Human  
390 Umbilical Cord for In Utero Myeloschisis Repair. *Obstet Gynecol.* Aug 2016;128(2):325-30.  
391 doi:10.1097/AOG.0000000000001512

- 392 18. Farmer DL, Thom EA, Brock JW, 3rd, et al. The Management of Myelomeningocele  
393 Study: full cohort 30-month pediatric outcomes. *Am J Obstet Gynecol*. Feb 2018;218(2):256 e1-  
394 256 e13. doi:10.1016/j.ajog.2017.12.001
- 395 19. Babcock CJ, Goldstein RB, Barth RA, Damato NM, Callen PW, Filly RA. Prevalence of  
396 ventriculomegaly in association with myelomeningocele: correlation with gestational age and  
397 severity of posterior fossa deformity. *Radiology*. Mar 1994;190(3):703-7.  
398 doi:10.1148/radiology.190.3.8115615
- 399 20. Zou J, Wang F, Yang X, et al. Association between rare variants in specific functional  
400 pathways and human neural tube defects multiple subphenotypes. *Neural Dev*. Jul 10  
401 2020;15(1):8. doi:10.1186/s13064-020-00145-7
- 402 21. Au KS, Hebert L, Hillman P, et al. Human myelomeningocele risk and ultra-rare  
403 deleterious variants in genes associated with cilium, WNT-signaling, ECM, cytoskeleton and cell  
404 migration. *Sci Rep*. Feb 11 2021;11(1):3639. doi:10.1038/s41598-021-83058-7
- 405 22. Tian T, Lei Y, Chen Y, et al. Somatic mutations in planar cell polarity genes in neural  
406 tissue from human fetuses with neural tube defects. *Hum Genet*. Oct 2020;139(10):1299-1314.  
407 doi:10.1007/s00439-020-02172-0
- 408 23. Galea GL, Maniou E, Edwards TJ, et al. Cell non-autonomy amplifies disruption of  
409 neurulation by mosaic *Vangl2* deletion in mice. *Nat Commun*. Feb 19 2021;12(1):1159.  
410 doi:10.1038/s41467-021-21372-4
- 411 24. White M, Arif-Pardy J, Connor KL. Identification of novel nutrient-sensitive gene  
412 regulatory networks in amniocytes from fetuses with spina bifida. *Reprod Toxicol*. Mar  
413 2023;116:108333. doi:10.1016/j.reprotox.2022.12.010

414

415 **10. Figure Legends**

416 **Figure 1. Morphometric classification of spina bifida lesions.** Using high-resolution  
417 fetoscopic images and videos obtained during surgery, we distinguished five lesion types based  
418 on stretching of the nerve roots and exposure of the neural placode. The table presents the key  
419 findings used to distinguish the category based on the visual characteristics observed in the  
420 fetoscopic view. The illustrations show the 5 types, demonstrating the differences in nerve root  
421 stretching and placode exposure to amniotic fluid (– *Blue line*: dura mater; – *Green line*:  
422 arachnoid layer; – *Black line*: pia mater; – *Pink line*: skin layer; *Yellow color*: Spinal cord and  
423 nerve roots; L: lumbar vertebra; S: sacral vertebra). Two rows of ultrasound images present  
424 (Top) transverse images at the mid-lesion and (Bottom) midline sagittal images of the lesion by  
425 lesion type. Yellow dotted arrows indicate the neural placode with dorsal displacement/ectopia  
426 from the vertebral canal. Two rows of fetoscopic images present lesions (Top) before and  
427 (Bottom) after dissection by lesion type. White dotted arrows indicate stretching nerve roots.

428 **Figure 2. Fetal head biometry differs by lesion type at baseline evaluation and changes**  
429 **after fetal surgery.** Box plots compare fetal (**A-C**) head circumference (HC) percentile, (**D-F**)  
430 largest ventricle size, and (**G-I**) Cortical Index (CI) by lesion type at preoperative evaluation (**A**,  
431 **D, G**) and at delivery (**B, E, H**) and show the change between timepoints (**C, F, I**). CI was  
432 calculated as HC (in mm) divided by ventricle size (in mm). Within each box, horizontal bold  
433 black lines denote median values; boxes extend from the 25th to the 75th percentile of each  
434 group's distribution of values; vertical extending lines denote adjacent values (i.e., the most  
435 extreme values within 1.5 interquartile range of the 25th and 75th percentile of each group);  
436 dots denote observations outside the range of adjacent values. \* $p < 0.05$ , \*\* $p < 0.01$ .

437

438 **Figure 1. Morphometric classification of spina bifida lesions.**

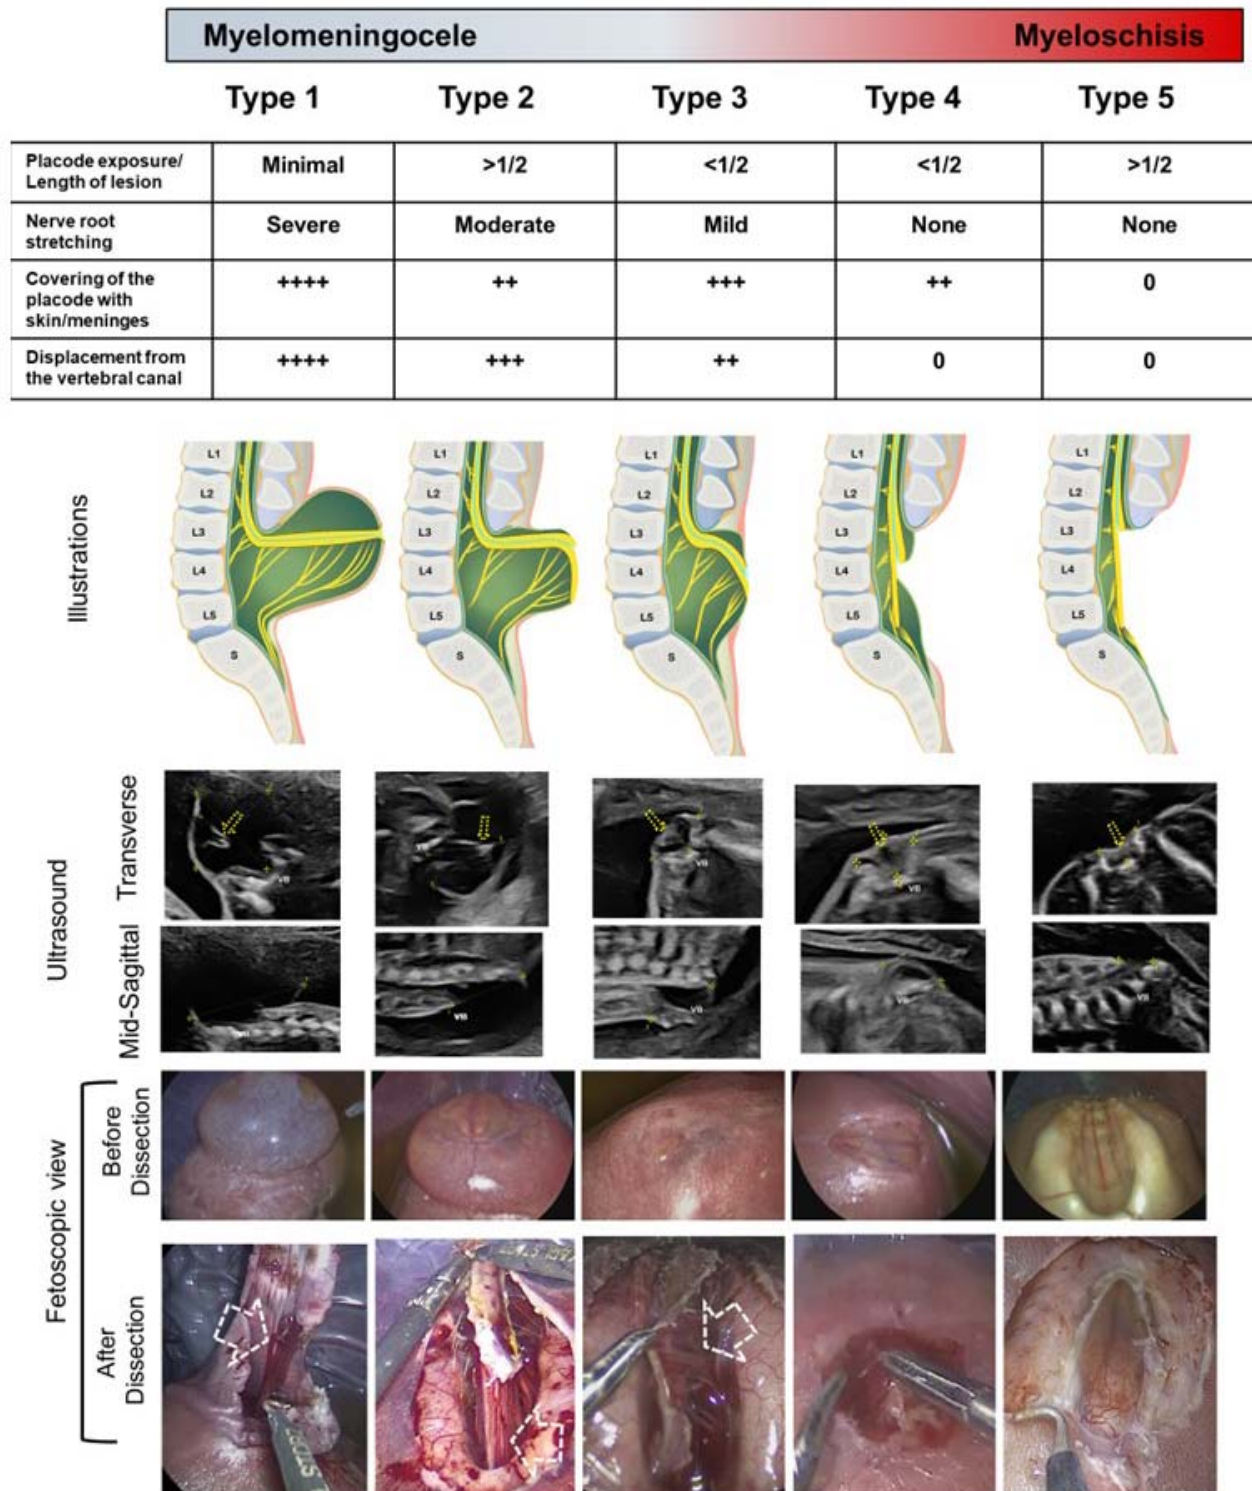

439  
440

441 **Figure 2. Fetal head biometry differs by lesion type at baseline evaluation and changes**  
442 **after fetal surgery.**

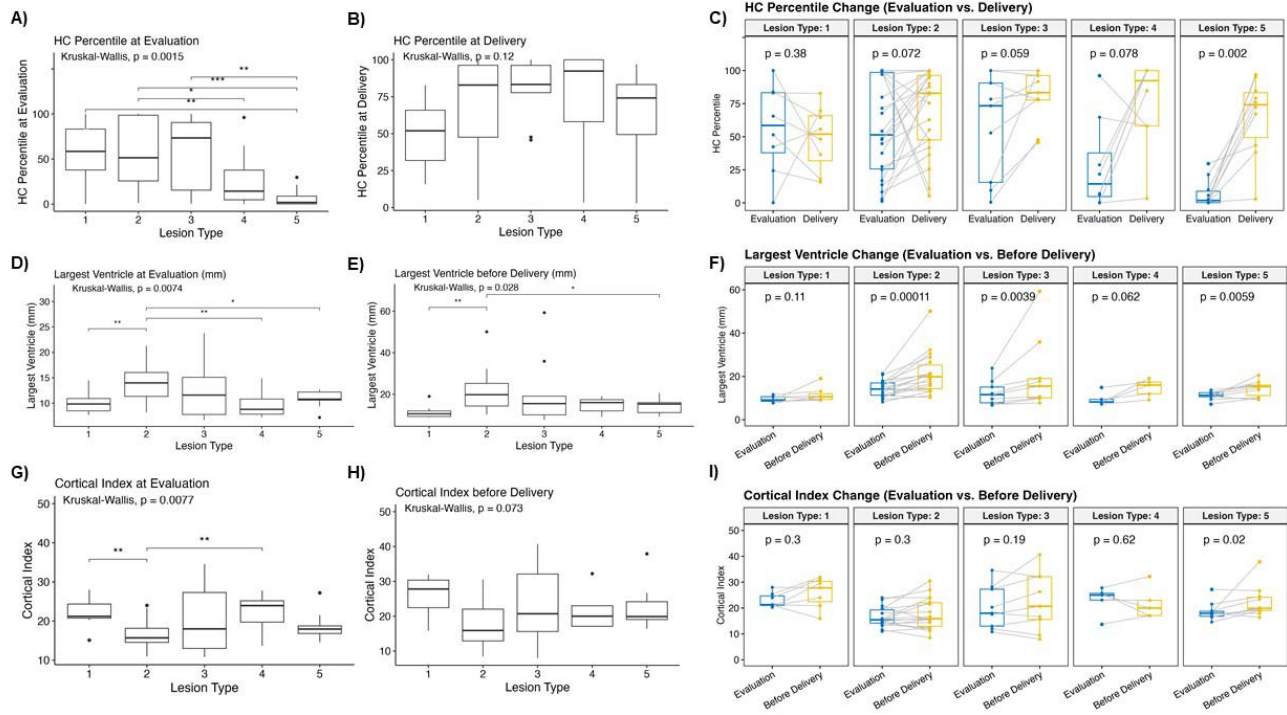

443  
444

445 **11. Tables**446 **Table 1. Maternal demographics and preoperative characteristics by lesion type.**

| Variables                                | All (n=57)        | Type 1 (n=8)                  | Type 2 (n=22)                 | Type 3 (n=9)                   | Type 4 (n=8)                 | Type 5 (n=10)                  | P-value           |
|------------------------------------------|-------------------|-------------------------------|-------------------------------|--------------------------------|------------------------------|--------------------------------|-------------------|
| Maternal age (years)                     | 29.9 (19, 44)     | 29.8 (22, 35)                 | 28.5 (21, 44)                 | 30.2 (19, 38)                  | 30.3 (22, 35)                | 26.9 (21, 34)                  | 0.380             |
| Gravidity                                | 2.2 (1, 7)        | 1.8 (1, 5)                    | 1.8 (1, 4)                    | 2.7 (1, 4)                     | 2.6 (1, 7)                   | 2.4 (1, 5)                     | 0.160             |
| Parity                                   | 0.8 (0, 4)        | 0.3 (0, 1)                    | 0.5 (0, 2)                    | 1.3 (0, 3)                     | 1.4 (0, 4)                   | 0.9 (0, 2)                     | 0.066             |
| Body Mass Index                          | 29.6 (19.7, 45)   | 32.2 (21.8, 42.1)             | 29.4 (22.0, 38.4)             | 29.9 (22.6, 45.2)              | 30.5 (19.7, 42.7)            | 27.0 (19.7, 35.9)              | 0.560             |
| GA at evaluation                         | 23.6 (21.0, 25.6) | 23.6 (23.1, 23.9)             | 23.6 (21.1, 25.6)             | 23.0 (21.0, 24.6)              | 23.7 (21.1, 24.9)            | 24.1 (23.0, 25.3)              | 0.110             |
| EFW (g)                                  | 744 (581, 1050)   | 788 (643, 1050)               | 759 (597, 1016)               | 736 (585, 953)                 | 717 (623, 814)               | 704 (581, 830)                 | 0.57              |
| Biparietal Diameter (mm)                 | 55.5 (47, 67.8)   | 57 (52, 65.3)                 | 56.8 (49.7, 67.6)             | 55.4 (50.3, 67.8)              | 54.1 (49, 57.4)              | 52.7 (47, 56.2)                | 0.12              |
| Head Circ. (mm)                          | 214 (184, 257)    | 217 (192, 243) <sup>ab</sup>  | 220 (195, 252) <sup>b</sup>   | 214 (195, 257) <sup>ab</sup>   | 206 (184, 224) <sup>a</sup>  | 203 (191, 222) <sup>a</sup>    | <b>0.03</b>       |
| Abdom. Circ. (mm)                        | 206 (185, 233)    | 210 (193, 233)                | 207 (190, 228)                | 205 (188, 226)                 | 205 (188, 217)               | 204 (185, 224)                 | 0.9               |
| Femur length (mm)                        | 44.9 (39.5, 51.4) | 46.2 (43.3, 50.7)             | 45.6 (41.4, 49.6)             | 45.0 (41.3, 51.4)              | 43.6 (39.5, 46.8)            | 43.3 (39.7, 46.1)              | 0.084             |
| Lesion Anterior-Posterior Dimension (cm) | 1.4 (0.1, 3.8)    | 2.6 (1.6, 3.8) <sup>a</sup>   | 1.8 (1.1, 2.7) <sup>b</sup>   | 1.0 (0.6, 1.5) <sup>c</sup>    | 0.6 (0.1, 1.0) <sup>cd</sup> | 0.5 (0.3, 0.9) <sup>d</sup>    | <b>&lt; 0.001</b> |
| Lesion Maximum Width (cm)                | 2.2 (0.9, 5.4)    | 3.6 (2.3, 5.4) <sup>a</sup>   | 2.4 (1.3, 3.4) <sup>b</sup>   | 2.0 (1.6, 2.6) <sup>c</sup>    | 1.6 (1.2, 2.4) <sup>d</sup>  | 1.3 (0.9, 2.0) <sup>d</sup>    | <b>&lt; 0.001</b> |
| Lesion Vertical Length (cm)              | 2.6 (0.3, 5.5)    | 3.6 (2.4, 5.5) <sup>a</sup>   | 2.7 (1.6, 3.9) <sup>b</sup>   | 2.1 (1.4, 3.5) <sup>c</sup>    | 2.3 (0.3, 4.1) <sup>bc</sup> | 2.4 (0.9, 3.3) <sup>bc</sup>   | <b>0.006</b>      |
| Lesion Volume (cm <sup>3</sup> )         | 6.2 (0.1, 59.6)   | 21.6 (5.3, 59.6) <sup>a</sup> | 6.3 (2.2, 12.4) <sup>b</sup>  | 2.3 (1.0, 4.8) <sup>c</sup>    | 1.4 (0.1, 5.3) <sup>cd</sup> | 0.9 (0.1, 2.6) <sup>d</sup>    | <b>&lt; 0.001</b> |
| Right ventricle (mm)                     | 11.0 (5.0, 21.0)  | 9.3 (5.1, 13.7) <sup>a</sup>  | 12.8 (6.8, 21.0) <sup>b</sup> | 11.3 (5.0, 20.2) <sup>ab</sup> | 8.0 (5.8, 11.4) <sup>a</sup> | 10.3 (7.0, 13.4) <sup>ab</sup> | <b>0.017</b>      |
| Left ventricle (mm)                      | 11.8 (5.3, 23.8)  | 9.5 (6.3, 14.5) <sup>a</sup>  | 13.7 (8.2, 21.3) <sup>b</sup> | 11.8 (5.3, 23.8) <sup>ab</sup> | 9.5 (6.5, 14.9) <sup>a</sup> | 11.2 (7.2, 13.7) <sup>a</sup>  | <b>0.006</b>      |
| Largest ventricle (mm)                   | 12.1 (6.7, 23.8)  | 10.2 (7.7, 14.5) <sup>a</sup> | 14.0 (8.2, 21.3) <sup>b</sup> | 12.4 (6.7, 23.8) <sup>ab</sup> | 9.7 (7.2, 14.9) <sup>a</sup> | 11.2 (7.2, 13.7) <sup>a</sup>  | <b>0.008</b>      |
| Level of Lesion                          |                   |                               |                               |                                |                              |                                | 0.831             |
| L2 & above                               | 6 (11%)           | 0 (0%)                        | 2 (9%)                        | 1 (11%)                        | 2 (25%)                      | 1 (10%)                        |                   |



| Variables            | All (n=57) | Type 1 (n=8) | Type 2 (n=22) | Type 3 (n=9) | Type 4 (n=8) | Type 5 (n=10) | P-value      |
|----------------------|------------|--------------|---------------|--------------|--------------|---------------|--------------|
| L3-L4                | 31 (54%)   | 5 (63%)      | 11 (50%)      | 4 (44%)      | 5 (63%)      | 6 (60%)       |              |
| L5-S1                | 20 (35%)   | 3 (38%)      | 9 (41%)       | 4 (44%)      | 1 (13%)      | 3 (30%)       |              |
| Tonsillar herniation |            |              |               |              |              |               | <b>0.005</b> |
| Foramen magnum       | 20 (35%)   | 7 (88%)      | 10 (46%)      | 2 (22%)      | 1 (13%)      | 0 (0%)        |              |
| C1-C2                | 22 (39%)   | 1 (13%)      | 9 (41%)       | 4 (44%)      | 3 (38%)      | 5 (50%)       |              |
| C3-C4                | 14 (25%)   | 0 (0%)       | 3 (14%)       | 3 (33%)      | 4 (50%)      | 4 (40%)       |              |
| Not documented       | 1 (2%)     | 0 (0%)       | 0 (0%)        | 0 (0%)       | 0 (0%)       | 1 (10%)       |              |
| No movement knee     | 5 (9%)     | 2 (25%)      | 2 (9%)        | 1 (11%)      | 0 (0%)       | 0 (0%)        | 0.353        |
| No movement ankles   | 10 (18%)   | 2 (25%)      | 4 (18%)       | 3 (33%)      | 1 (13%)      | 0 (0%)        | 0.350        |
| No movement hip      | 1 (2%)     | 0 (0%)       | 1 (5%)        | 0 (0%)       | 0 (0%)       | 0 (0%)        | 1.000        |
| Presence of Talipes  | 12 (21%)   | 2 (25%)      | 5 (23%)       | 2 (22%)      | 1 (13%)      | 2 (20%)       | 1.000        |

447 Data are presented as mean (range) by Kruskal-Wallis test; or as n (%) by Fisher's exact test. Groups with a different letter (a, b, c or d) are significantly different  
448 from each other ( $p < 0.05$ ). Abdom. Circ., abdominal circumference; EFW, estimated fetal weight; GA, gestational age; Head Circ., head circumference.  
449

450 **Table 2. Linear regression analysis of factors associated with preoperative ventricle size.**

| Independent Variables | Beta   | Standard Error | t-Value | P-Value       |
|-----------------------|--------|----------------|---------|---------------|
| Lesion Type 1         | 0.664  | 1.877          | 0.35    | 0.7252        |
| Lesion Type 2         | 3.959  | 1.432          | 2.76    | <b>0.0080</b> |
| Lesion Type 3         | 1.960  | 1.599          | 1.23    | 0.2261        |
| Lesion Type 4         | -1.641 | 1.652          | -0.99   | 0.3253        |
| Lesion Level          | -1.371 | 0.743          | -1.84   | 0.0712        |
| Tonsillar Herniation  | 0.896  | 0.717          | 1.25    | 0.2174        |

451 All lesion types are compared with lesion Type 5.

452

453 **Table 3. Postoperative and neonatal outcomes by lesion type.**

| Variables                        | All (n=57)        | Type 1 (n=8)                   | Type 2 (n=22)              | Type 3 (n=9)                   | Type 4 (n=8)                     | Type 5 (n=10)                | P-value           |
|----------------------------------|-------------------|--------------------------------|----------------------------|--------------------------------|----------------------------------|------------------------------|-------------------|
| GA at Surgery (wks)              | 25.3 (24.1, 26.0) | 25.2 (24.7, 25.7)              | 25.3 (24.1, 26.0)          | 25.1 (24.3, 25.9)              | 25.4 (24.6, 25.9)                | 25.2 (24.1, 26.0)            | 0.480             |
| Fetal surgery time (mins)        | 131.8 (48, 209)   | 128.5 (48, 209)                | 133.9 (92, 171)            | 126.7 (90, 162)                | 127.3 (49, 172)                  | 137.7 (97, 193)              | 0.960             |
| Need for skin patch closure      | 18 (32%)          | 2 (25%) <sup>a</sup>           | 2 (9%) <sup>a</sup>        | 1 (11%) <sup>a</sup>           | 3 (38%) <sup>a</sup>             | 10 (100%) <sup>b</sup>       | <b>&lt; 0.001</b> |
| PPROM                            | 17 (30%)          | 5 (63%)                        | 5 (23%)                    | 3 (33%)                        | 2 (25%)                          | 2 (20%)                      | 0.314             |
| GA at Delivery (wks)             | 34.9 (25.4, 39.4) | 32.4 (28.7, 34.9) <sup>a</sup> | 36 (32.7, 39) <sup>b</sup> | 35.9 (33, 39.4) <sup>b,c</sup> | 33.1 (25.4, 37.4) <sup>a,c</sup> | 35 (31, 38.7) <sup>b,c</sup> | 0.01              |
| Spontaneous / Indicated delivery |                   |                                |                            |                                |                                  |                              | 0.758             |
| Spontaneous                      | 24 (42%)          | 4 (50%)                        | 10 (45%)                   | 2 (22%)                        | 4 (50%)                          | 4 (40%)                      |                   |
| Indicated                        | 33 (58%)          | 4 (50%)                        | 12 (55%)                   | 7 (78%)                        | 4 (50%)                          | 6 (60%)                      |                   |
| CSF leakage at birth             | 0/55 (0%)         | 0 (0%)                         | 0/21 (0%)                  | 0/8 (0%)                       | 0 (0%)                           | 0 (0%)                       |                   |
| Wound revision                   | 6/55 (11%)        | 0 (0%)                         | 1/21 (5%)                  | 1/8 (13%)                      | 2 (25%)                          | 2 (20%)                      | 0.321             |
| CSF diversion NICU               | 9/55 (16%)        | 0 (0%)                         | 6/21 (29%)                 | 1/8 (13%)                      | 1 (13%)                          | 1 (10%)                      | 0.467             |
| NICU length of stay (days)       | 27.5 (0, 122)     | 40.4 (17, 71)                  | 17.8 (0, 44)               | 17.8 (3, 44)                   | 50.4 (12, 122)                   | 26.8 (14, 33)                | <b>&lt; 0.001</b> |

454 Data are presented as mean (range) by Kruskal-Wallis test or as n (%) by Fisher's exact test. Groups with a different letter (a or b) are significantly different from  
455 each other (p < 0.05). CSF, cerebrospinal fluid; GA, gestational age; NICU, neonatal intensive care unit; PPRM, preterm premature rupture of membranes.

456
